# Supplementary material for: Hormonal Receptor Status Determines Prognostic Significance of FGFR2 in Invasive Breast Carcinoma
Source: Cancers (Basel). 2020 Sep 22;12(9):2713. doi: 10.3390/cancers12092713 (PMC7564845; doi:10.3390/cancers12092713)
Supplement: Supplementary file 1 [file cancers-12-02713-s001.pdf]

# Hormonal Receptor Status Determines Prognostic Significance of FGFR2 in Invasive Breast Carcinoma

Marcin Braun, Dominika Piasecka, Bartłomiej Tomasik, Kamil Mieczkowski, Konrad Stawiski, Aleksandra Zielinska, Janusz Kopczynski, Dariusz Nejcz, Radzisław Kordek, Rafał Sadej and Hanna M. Romanska

**Table S1.** Expression of FGFR2 protein and mRNA in relation to ER/PR status. Nominal variables are presented as raw values followed by percentages of the respective groups, continuous variables are presented as medians and interquartile ranges in brackets;

| Variable                                | ER-PR-         | ER+PR-           | ER+PR+           | p-value  |
|-----------------------------------------|----------------|------------------|------------------|----------|
| FGFR2 protein [H-score] <sup>1</sup>    | 0.0 (0.0–26.5) | 93.0 (5.0–205.0) | 105 (25.0–202.0) | <0.001 * |
| FGFR2 by H-score quartiles <sup>2</sup> |                |                  |                  |          |
| 0–75                                    | 27 (84.4)      | 31 (42.5)        | 90 (25.9)        | <0.001 * |
| 76–150                                  | 2 (6.3)        | 13 (17.8)        | 57 (23.5)        |          |
| 151–225                                 | 3 (9.4)        | 13 (17.8)        | 45 (18.6)        |          |
| 226–300                                 | 0 (0.0)        | 16 (21.9)        | 50 (20.7)        |          |
| FGFR2 mRNA [log2] <sup>1</sup>          | 7.8 (6.6–9.2)  | 8.5 (7.2–9.4)    | 8.6 (8.0–9.3)    | 0.049 *  |

<sup>1</sup> ANOVA Kruskal-Wallis or ANOVA test, <sup>2</sup> Pearson's chi-squared test, \* significant differences.

**Table S2.** Cox univariate and multivariate overall and disease-free survival analyses according to prognostic clinicopathological features, including FGFR2 status (low vs. high divided by 1<sup>st</sup> tercile of protein H-score). Hazard ratios are present for nominal variables, while  $\beta$ -parameters for continuous variables. Variables significant only in univariate analyses were incorporated in multivariate analyses. CI—confidence interval, NA—not applicable.

| Variable                                     | Hazard ratio (95% CI)/<br>$\beta$ -parameter (SE) univariate<br>analysis | p-value  | Hazard ratio/<br>$\beta$ -parameter multivariate<br>analysis | p-value |
|----------------------------------------------|--------------------------------------------------------------------------|----------|--------------------------------------------------------------|---------|
| <b>Overall survival</b>                      |                                                                          |          |                                                              |         |
| Age [years]                                  | 0.08 (0.01)                                                              | <0.001 * | 0.05 (0.02)                                                  | 0.002 * |
| Grade [ref. G1]                              | NA                                                                       | 0.987    | NA                                                           | NA      |
| Ki67 [%]                                     | 0.01 (0.02)                                                              | 0.583    | NA                                                           | NA      |
| HER2 [ref. no<br>amplification]              | 1.29 (0.54–3.07)                                                         | 0.566    | NA                                                           | NA      |
| Hormonal<br>receptor status<br>[ref. ER+PR+] | 4.18 (1.98–8.84)                                                         | <0.001 * | 2.17 (0.89–5.29)                                             | 0.230   |
| FGFR2 status [ref.<br>high]                  | 2.34 (1.26–4.34)                                                         | 0.007 *  | 1.26 (0.63–2.52)                                             | 0.518   |
| Tumor size [mm]                              | 0.04 (0.01)                                                              | <0.001 * | 0.02 (0.02)                                                  | 0.120   |
| Lymph node<br>metastases [ref.<br>absent]    | 1.90 (0.99–3.65)                                                         | 0.052    | NA                                                           | NA      |
| Stage [ref. very<br>early]                   | 30.80 (2.06–460.49)                                                      | 0.017 *  | 1.87 (0.05–67.51)                                            | 0.937   |
| <b>Disease-free survival</b>                 |                                                                          |          |                                                              |         |
| Age [years]                                  | 0.05 (0.01)                                                              | <0.001 * | 0.03 (0.02)                                                  | 0.007 * |
| Grade [ref. G1]                              | 4.31 (1.00–18.52)                                                        | 0.012 *  | 3.55 (0.45–27.77)                                            | 0.188   |

|                                        |                  |          |                  |       |
|----------------------------------------|------------------|----------|------------------|-------|
| Ki67 [%]                               | 0.01 (0.01)      | 0.949    | NA               | NA    |
| HER2 [ref. no amplification]           | 0.92 (0.41–2.05) | 0.834    | NA               | NA    |
| Hormonal receptor status [ref. ER+PR+] | 3.88 (1.94–7.73) | <0.001 * | 1.63 (0.68–3.90) | 0.432 |
| FGFR2 status [ref. high]               | 2.22 (1.25–3.93) | 0.007 *  | 1.31 (0.65–2.62) | 0.448 |
| Tumor size [mm]                        | 0.04 (0.01)      | <0.001 * | 0.01 (0.01)      | 0.293 |
| Lymph node metastases [ref. absent]    | 1.90 (1.04–3.47) | 0.036 *  | 1.49 (0.76–2.93) | 0.243 |
| Stage [ref. very early]                | 2.73 (0.88–8.43) | 0.205    | NA               | NA    |

\*significant differences.

**Table S3.** List of PR-dependent genes (PR(mol) – “molecular signature”) signifying receptor activation and rapid degradation with respective reasons for inclusion.

| Target Identifier | Gene name                                                                                                     | Reason for inclusion to the signature                                                                                                                                                                                 |
|-------------------|---------------------------------------------------------------------------------------------------------------|-----------------------------------------------------------------------------------------------------------------------------------------------------------------------------------------------------------------------|
| NM_000926         | <i>PGR</i> (progesterone receptor)                                                                            | Progesterone receptor gene transcript - levels of <i>PGR</i> mRNA are strongly correlated with PR protein and its downstream pathway activity [1–4]                                                                   |
| NM_022970         | <i>FGFR2</i> (fibroblast growth factor receptor 2)                                                            | Main gene of interest in this study – good marker of PR expression in the TCGA analysis - significantly different levels of <i>FGFR2</i> in ER+PR+ and ER+PR-                                                         |
| NM_005067         | <i>SIAH2</i> (Seven in Absentia Homolog 2)                                                                    | PR degradation marker - an ubiquitin E3 ligase involved in degradation of PR, especially in tumours with high activity of PR pathway [5]                                                                              |
| NM_198400         | <i>NEDD4</i> (Neural Precursor Cell Expressed, Developmentally Down-Regulated 4, E3 Ubiquitin Protein Ligase) | PR degradation marker - a ubiquitin E3 ligase reported to be involved in degradation of PR downstream mediators [6]                                                                                                   |
| NM_001993         | F3 (Coagulation Factor III, Tissue Factor)                                                                    | Marker of PR activity – secreted molecule highly up-regulated (18-fold change) by PR [7–9]; displayed significantly different levels between ER+PR+ and ER+PR- in the TCGA analysis                                   |
| NM_005195         | CEBPD (CCAAT/Enhancer Binding Protein Delta)                                                                  | PR downstream activation marker – transcription factor up-regulated (6-fold change) by PR [7–9]; displayed significantly different levels between ER+PR+ and ER+PR- in the TCGA analysis                              |
| NM_000820         | GAS6 (Growth Arrest Specific 6)                                                                               | PR downstream activation marker – secreted molecule highly up-regulated (23-fold change) by PR [7–9]                                                                                                                  |
| NM_005980         | S100p (S100 Calcium Binding Protein P)                                                                        | PR downstream activation marker – calcium-binding protein, up-regulated (2–4 fold change) by PR [7–9]                                                                                                                 |
| NM_009061         | RGS2 (Regulator of G-protein signalling 2)                                                                    | PR downstream activation marker – GTPase activating protein, up-regulated in the report by Knutson et al, verified <i>in vitro</i> [8], significantly different levels between ER+PR+ and ER+PR- in the TCGA analysis |
| NM_001037162      | ACOT6 (Acyl-CoA Thioesterase 6)                                                                               | PR downstream activation marker – involved in metabolism, up-regulated by PR [8]                                                                                                                                      |
| NM_004235         | KLF4 (Kruppel Like Factor, Epithelial Zinc Finger Protein EZF)                                                | PR downstream activation marker – transcription factor up-regulated (6–8 fold change) by PR [7–9]                                                                                                                     |

|              |                                                               |                                                                                                                                                                                                              |
|--------------|---------------------------------------------------------------|--------------------------------------------------------------------------------------------------------------------------------------------------------------------------------------------------------------|
| NM_000196    | HSD11B2 (Hydroxysteroid 11-Beta Dehydrogenase 2)              | PR downstream activation marker – involved in cholesterol or steroid metabolism and trafficking, highly up-regulated (23–8 fold change) by PR [7–9]                                                          |
| NM_003152    | STAT5A (Signal Transducer And Activator Of Transcription 5A)  | PR downstream activation marker – transcription factor up-regulated (6 fold change) by PR [7–9]                                                                                                              |
| NM_014737    | RASSF2 (Ras Association Domain Family Member 2)               | PR downstream activation marker – involved in signal transduction from membrane, up-regulated (10 fold change) by PR, verified <i>in vitro</i> [7–9]                                                         |
| NM_001165    | BIRC3 (Baculoviral IAP Repeat Containing 3)                   | PR downstream activation marker – involved in cell cycle and apoptosis, up-regulated (7 fold change) by PR [7–9]                                                                                             |
| NM_170604    | RASGRP4 (RAS Guanyl Releasing Protein 4)                      | PR downstream activation marker – selected from the TCGA analysis as one of the most significantly different between PR+ and PR- patients, member of RAS guanyl nucleotide-releasing, up-regulated by PR [8] |
| NM_015409    | EP400 (E1A Binding Protein P400)                              | PR downstream activation marker – the upregulation effect [7–9]; significantly different levels between ER+PR+ and ER+PR- in the TCGA analysis                                                               |
| NM_00114577  | FKBP5 (FK506 Binding Protein 5)                               | PR downstream activation marker – involved in chaperones/protein folding up-regulated (3–9 fold change) by PR [7–9]                                                                                          |
| NM_001047160 | NET1 (Neuroepithelial Cell Transforming 1, ARHGEF8)           | PR downstream activation marker – selected from the TCGA analysis as one of the significantly different between PR+ and PR- patients, involved in signal transduction from membrane [7–9]                    |
| NM_001128431 | SLC39A14 (Solute Carrier Family 39 Member 14)                 | PR downstream activation marker – selected from the TCGA analysis as one of the significantly different between PR+ and PR- patients                                                                         |
| NM_001363568 | UCK2 (Uridine-Cytidine Kinase 2)                              | PR downstream activation marker – selected from the TCGA analysis as one of the significantly different between PR+ and PR- patients [7–9]                                                                   |
| NM_001020658 | PUM1 (pumilio RNA binding family member 1)                    | House-keeping gene recommended by Nanostring                                                                                                                                                                 |
| NM_004168    | SDHA (succinate dehydrogenase complex flavoprotein subunit A) | House-keeping gene recommended by Nanostring                                                                                                                                                                 |
| NM_003194    | TBP (TATA-box binding protein)                                | House-keeping gene recommended by Nanostring                                                                                                                                                                 |

**Table S4.** Clinical and pathological characteristics of PR(mol-) versus PR(mol+) subgroups within ER+ patients. Nominal variables are presented as raw values followed by percentages of the respective groups, continuous variables are presented as medians and interquartile ranges in brackets.

| Variable                       | PR(mol-)<br>n = 110<br>(31.8) | PR(mol+)<br>n = 204<br>(59.0) | p-value |
|--------------------------------|-------------------------------|-------------------------------|---------|
| Age [years] <sup>1</sup>       | 65.0 (58.0–70.0)              | 63.0 (52.0–71.2)              | 0.125   |
| Menopausal status <sup>2</sup> |                               |                               |         |
| Pre                            | 8 (8.2)                       | 25 (13.3)                     | 0.197   |
| Post                           | 90 (91.8)                     | 163 (86.7)                    |         |
| Grade <sup>2</sup>             |                               |                               |         |
| 1                              | 10 (9.1)                      | 30 (14.7)                     | 0.039 * |
| 2                              | 70 (63.6)                     | 141 (69.1)                    |         |
| 3                              | 30 (27.3)                     | 33 (16.2)                     |         |
| Ki67 [%] <sup>1</sup>          | 22.0 (10.0–40.0)              | 12.0 (5.0–22.0)               | 0.003 * |
| HER2-positivity <sup>2</sup>   | 19 (17.3)                     | 13 (6.4)                      | 0.002 * |
| Tumour size [mm] <sup>1</sup>  | 22.5 (17.0–30.0)              | 20.0 (15.0–25.0)              | 0.012 * |
| T feature <sup>2</sup>         |                               |                               | 0.007 * |

|                               |               |               |       |
|-------------------------------|---------------|---------------|-------|
| pT1                           | 29 (42.6)     | 99 (60.0)     | 0.919 |
| pT2                           | 33 (48.5)     | 63 (38.2)     |       |
| pT3/4                         | 6 (8.8)       | 3 (1.8)       |       |
| Metastases present            | 37 (34.6)     | 68 (34.0)     |       |
| N feature <sup>2</sup>        |               |               | 0.682 |
| pN0                           | 70 (65.4)     | 135 (67.5)    |       |
| pN1                           | 24 (22.4)     | 47 (23.5)     |       |
| pN2-3                         | 13 (12.2)     | 18 (9.0)      |       |
| Staging <sup>2</sup>          |               |               | 0.220 |
| Very early (Stage IA)         | 36 (33.3)     | 86 (43.0)     |       |
| Early (IB-III A)              | 64 (59.3)     | 104 (52.0)    |       |
| Advanced (IIIB-C, IV)         | 8 (7.4)       | 10 (5.0)      |       |
| Multifocality <sup>2</sup>    | 8 (11.8)      | 27 (16.4)     | 0.372 |
| DCIS present <sup>2</sup>     | 35 (31.8)     | 56 (27.5)     | 0.416 |
| DFS events <sup>3</sup>       | 14 (14.1)     | 21 (12.5)     | 0.354 |
| Disease-free survival [years] | 3.8 (2.3–4.9) | 4.3 (2.8–6.7) | 0.551 |
| Deaths <sup>3</sup>           | 11 (10.0)     | 20 (9.8)      |       |
| Overall survival [years]      | 4.0 (2.8–5.5) | 4.7 (3.0–6.7) |       |

<sup>1</sup> Mann-Whitney U test, <sup>2</sup> Pearson's chi-squared test, <sup>3</sup> log-rank test, \* significant differences.

**Table S5.** Expression of FGFR2 protein and mRNA in PR(mol-) versus PR(mol+) patients within ER+ subgroup. Nominal variables are presented as raw values followed by percentages of the respective groups, continuous variables are presented as medians and interquartile ranges in brackets.

| Variable                                | PR(mol-)<br><i>n</i> = 110<br>(35.0) | PR(mol+)<br><i>n</i> = 204<br>(65.0) | <i>p</i> -value |
|-----------------------------------------|--------------------------------------|--------------------------------------|-----------------|
| FGFR2 protein [H-score] <sup>1</sup>    | 103.5 (21.0–210.0)                   | 105 (22.0–201.5)                     | 0.739           |
| FGFR2 by H-score quartiles <sup>2</sup> |                                      |                                      | 0.929           |
| 0–75                                    | 44 (40.0)                            | 77 (37.8)                            |                 |
| 76–150                                  | 22 (20.0)                            | 47 (23.0)                            |                 |
| 151–225                                 | 20 (18.2)                            | 38 (18.6)                            |                 |
| 226–300                                 | 24 (21.8)                            | 42 (20.6)                            |                 |
| FGFR2 mRNA [log2] <sup>1</sup>          | 8.3 (7.2–9.3)                        | 8.7 (8.1–9.4)                        | 0.008 *         |

<sup>1</sup> Mann-Whitney U test, <sup>2</sup> Pearson's chi-squared test, \* significant differences.

**Table S6.** Multivariate analyses of the combined effect of FGFR2 (protein) status and PR(mol) status on the poor prognostic associations characterised for FGFR2(low). The analysis involves only ER+ patients. Hazard ratios with confidence intervals are present for overall and disease-free survival,  $\beta$ -parameters and standard deviation for Ki67 proliferation index and odds ratios (OR) with confidence intervals for tumor grade.

| Feature                                                    | FGFR2 status (high as reference)                 | PR(mol) status (PR(mol+) as reference)          |
|------------------------------------------------------------|--------------------------------------------------|-------------------------------------------------|
| Tumor grade<br>(probability for grade 3 regarding grade 1) | OR 4.76 (95% CI 1.69–12.50);<br><i>p</i> = 0.003 | OR 2.86 (95% CI 1.15–7.14);<br><i>p</i> = 0.023 |
| Ki67 proliferation index                                   | $\beta$ = 5.1 ( $\pm$ 1.77), <i>p</i> = 0.005    | $\beta$ = 5.1 ( $\pm$ 1.77), <i>p</i> = 0.005   |
| Overall survival                                           | HR 2.25 (95% CI 1.11–4.58), <i>p</i> = 0.025     | HR 1.32 (95% CI 0.63–2.77), <i>p</i> = 0.462    |
| Disease-free survival                                      | HR 2.07 (95% CI 1.06–4.05), <i>p</i> = 0.034     | HR 1.50 (95% CI 0.76–2.98), <i>p</i> = 0.246    |

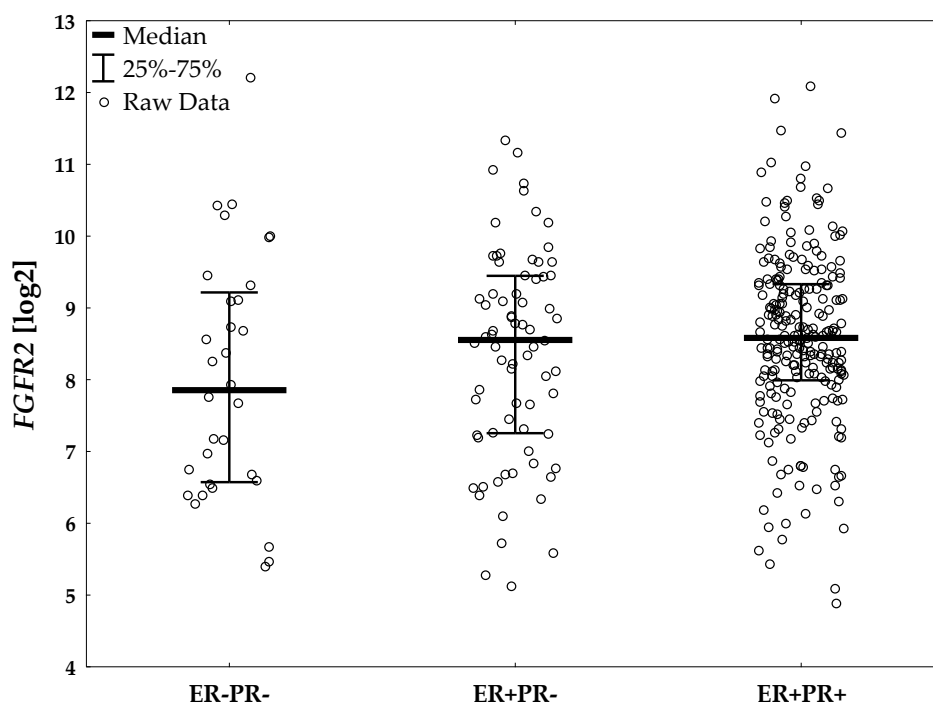

**Figure S1.** *FGFR2* mRNA levels compared between hormonal receptor status subgroups (ER-PR- vs. ER+PR- vs. ER+PR+),  $p = 0.049$  from ANOVA test.

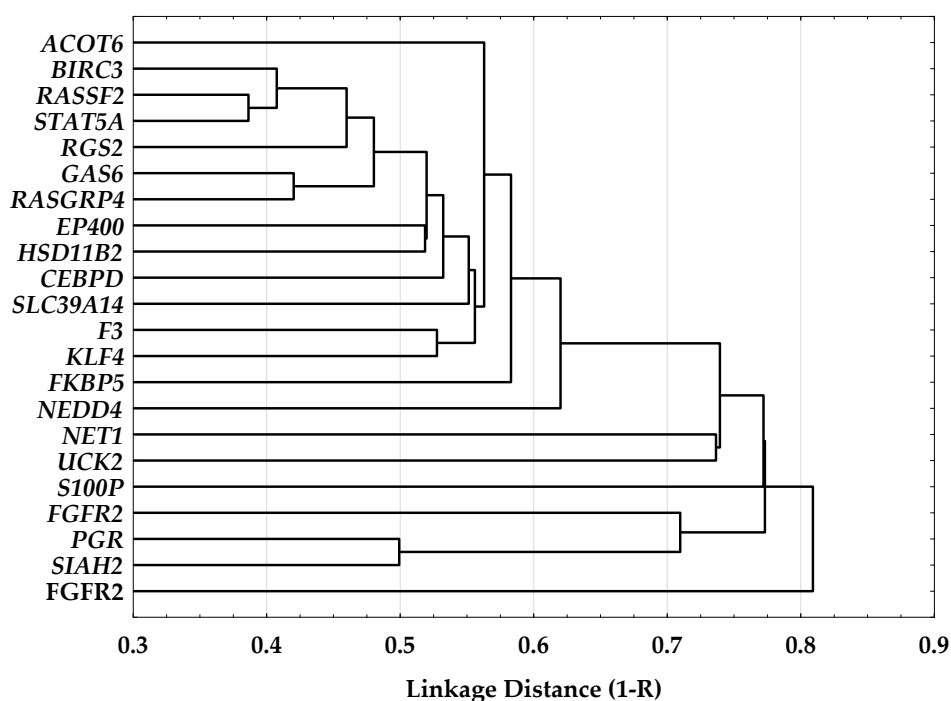

**Figure S2.** Hierarchical tree-clustering of genes included in PR-dependent molecular signature. All patients with good quality RNA were included in this analysis. Linkage distance is showed as 1-R (Spearman).

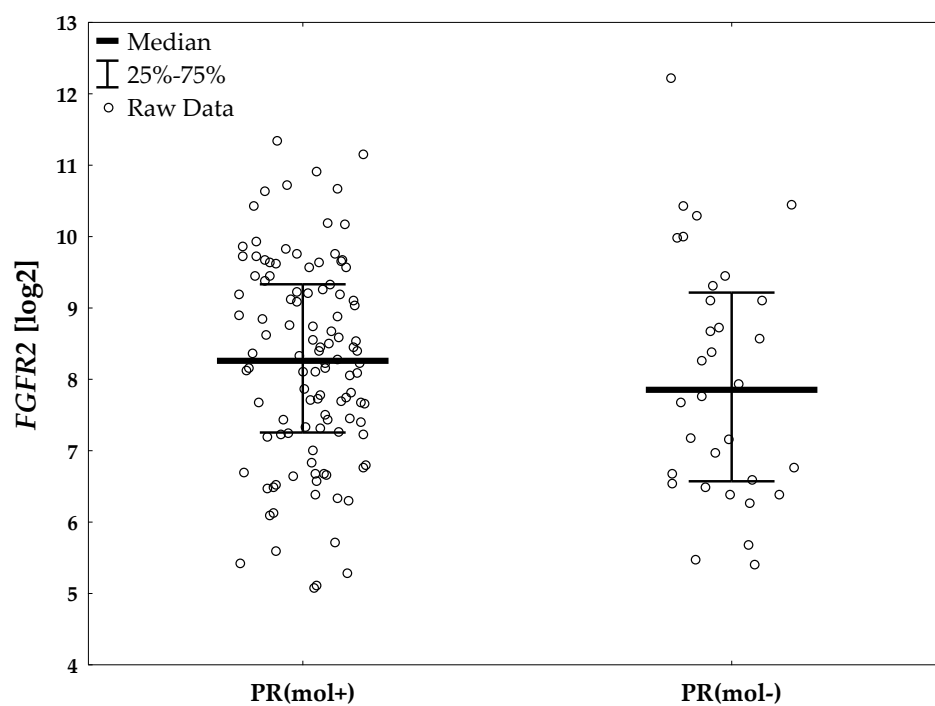

**Figure S3.** *FGFR2* mRNA levels compared between estrogen receptor status and progesterone receptor molecular activity status (ER-PR(mol-) vs. ER+PR(mol-) vs. ER+PR(mol+)),  $p = 0.002$ .  $p$ -value from ANOVA test.

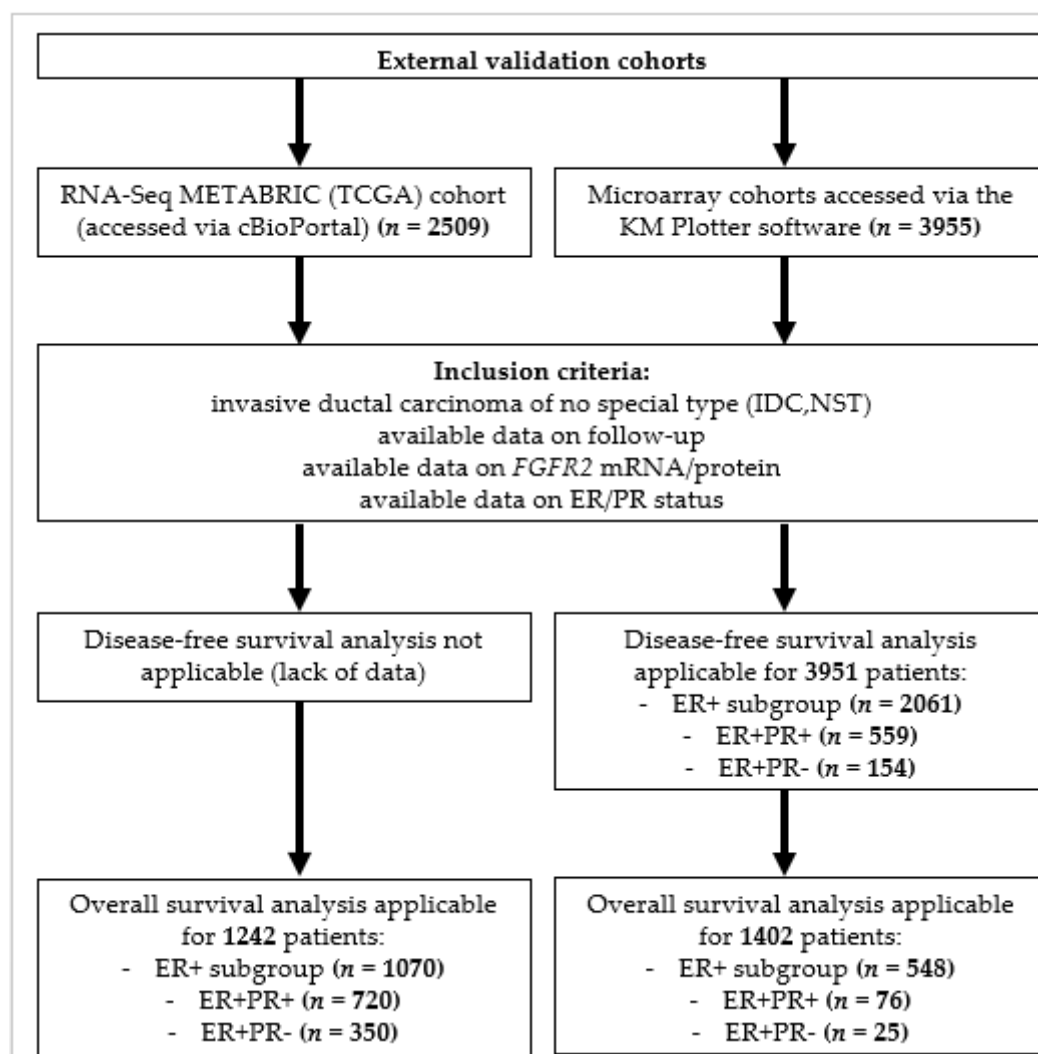

**Figure S4.** Flowchart of the in silico verification with indication of numbers of patients from the external databases included in every analysis. “ER+” subgroup included all ER+ patients regardless of PR status and it comprised ER+PR+ and ER+PR- subgroups. IDC, NST – invasive ductal carcinoma of no special type, ER – estrogen receptor protein status, PR – progesterone receptor protein status, *FGFR2* – fibroblast growth factor receptor 2 protein.

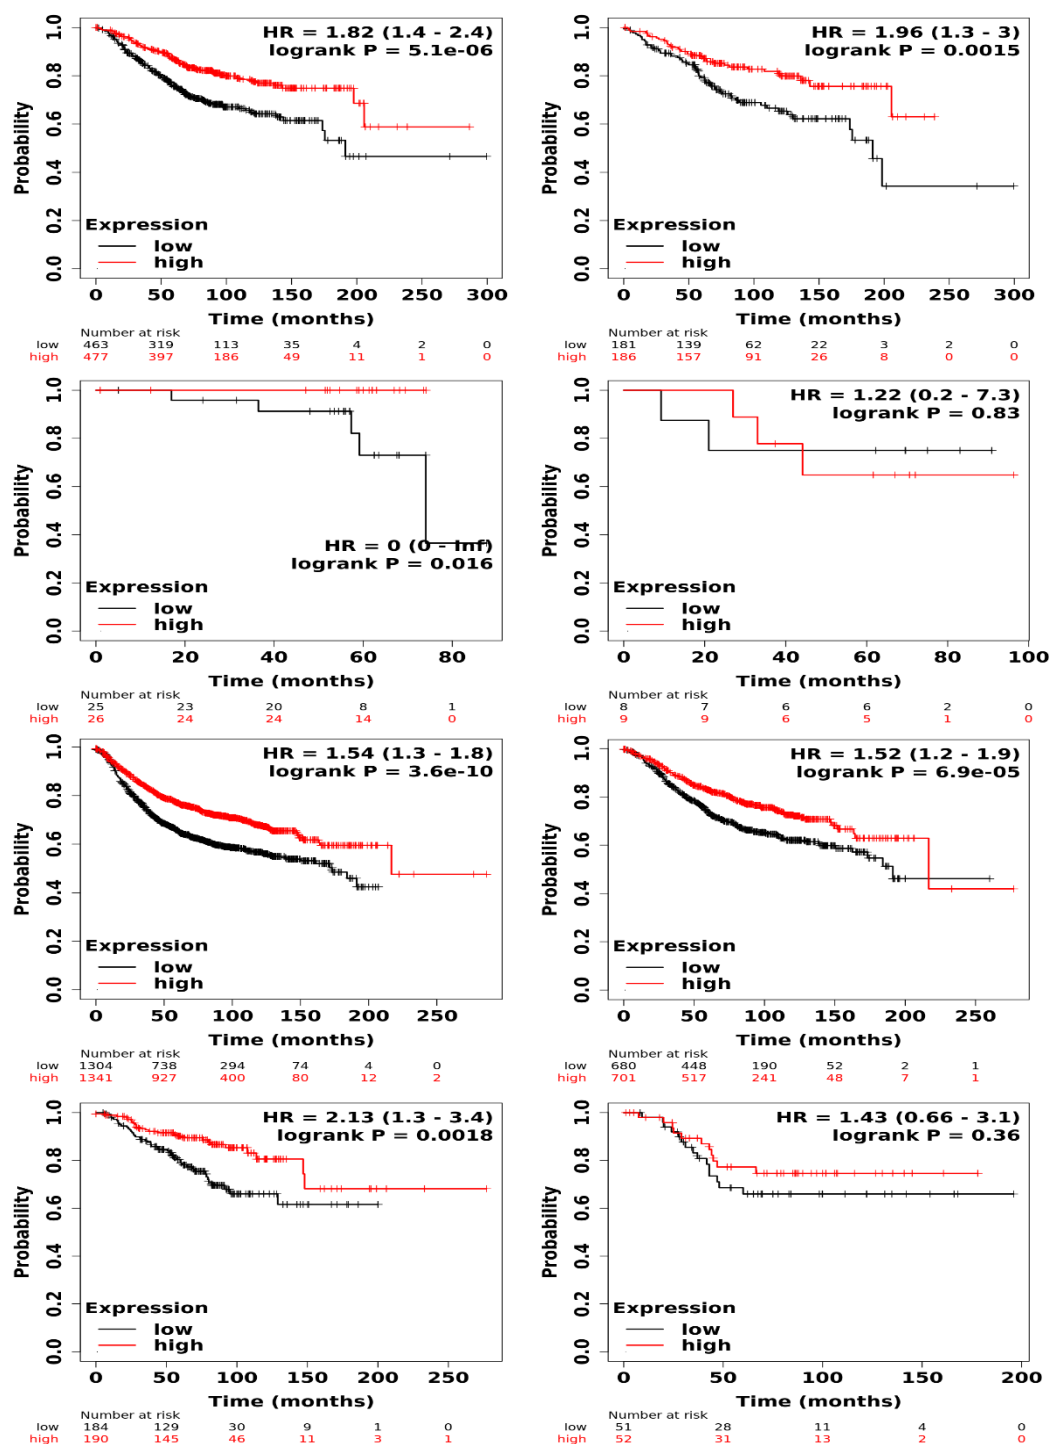

**Figure S5.** Kaplan-Meier curves for OS (a–d) and PFS (e–h) regarding FGFR2 microarray mRNA levels. “ER+” subgroup included all ER+ patients regardless of PR status and it comprised ER+PR+ and ER+PR- subgroups. FGFR2low stands for 1st tercile and FGFR2high for 2nd-3rd terciles. Plots were generated using online open access tool KM plotter (encompassing patients different than those included in TCGA database). (a) OS probability in all 1402 breast cancer patients, (b) OS probability in all 548 ER+ breast cancer patients, (c) OS probability in all 76 ER+PR+ patients, (d) OS probability in all 25 ER+PR- patients., (e) PFS probability in all 3951 breast cancer patients, (f) PFS probability in all 2061 ER+ breast cancer patients, (g) PFS probability in all 559 ER+PR+ patients, (h) PFS probability in all 154 ER+PR- patients.

## References

1. Sinn, H.-P.; Schneeweiss, A.; Keller, M.; Schlombs, K.; Laible, M.; Seitz, J.; Lakis, S.; Veltrup, E.; Altevogt, P.; Eidt, S.; et al. Comparison of immunohistochemistry with PCR for assessment of ER, PR, and Ki-67 and prediction of pathological complete response in breast cancer. *BMC Cancer* **2017**, *17*, 1–10, doi:10.1186/s12885-017-3111-1.
2. Laible, M.; Schlombs, K.; Kaiser, K.; Veltrup, E.; Herlein, S.; Lakis, S.; Stöhr, R.; Eidt, S.; Hartmann, A.; Wirtz, R.M.; et al. Technical validation of an RT-qPCR in vitro diagnostic test system for the determination of breast cancer molecular subtypes by quantification of ERBB2, ESR1, PGR and MKI67 mRNA levels from formalin-fixed paraffin-embedded breast tumor specimens. *BMC Cancer* **2016**, *16*, 1–14, doi:10.1186/s12885-016-2476-x.
3. Varga, Z.; Lebeau, A.; Bu, H.; Hartmann, A.; Penault-Llorca, F.; Guerini-Rocco, E.; Schraml, P.; Symmans, F.; Stoehr, R.; Teng, X.; et al. An international reproducibility study validating quantitative determination of ERBB2, ESR1, PGR, and MKI67 mRNA in breast cancer using MammaTyper®. *Breast Cancer Res.* **2017**, *19*, 55, doi:10.1186/s13058-017-0848-z.
4. Wilson, T.R.; Xiao, Y.; Spoerke, J.M.; Fridlyand, J.; Koeppen, H.; Fuentes, E.; Huw, L.Y.; Abbas, I.; Gower, A.; Schleifman, E.B.; et al. Development of a robust RNA-based classifier to accurately determine ER, PR, and HER2 status in breast cancer clinical samples. *Breast Cancer Res. Treat.* **2014**, *148*, 315–325, doi:10.1007/s10549-014-3163-8.
5. Jansen, M.P.; Ruigrok-Ritstier, K.; Dorssers, L.C.; van Staveren, I.L.; Look, M.P.; Meijer-van Gelder, M.E.; Sieuwerts, A.M.; Helleman, J.; Sleijfer, S.; Klijn, J.G.; et al. Downregulation of SIAH2, an ubiquitin E3 ligase, is associated with resistance to endocrine therapy in breast cancer. *Breast Cancer Res. Treat.* **2009**, *116*, 263–271, doi:10.1007/s10549-008-0125-z.
6. Santos, S.J.; Aupperlee, M.D.; Xie, J.; Durairaj, S.; Miksicek, R.; Conrad, S.E.; Leipprandt, J.R.; Tan, Y.S.; Schwartz, R.C.; Haslam, S.Z. Progesterone receptor A-regulated gene expression in mammary organoid cultures. *J. Steroid Biochem. Mol. Biol.* **2009**, *115*, 161–172, doi:10.1016/j.jsbmb.2009.04.001.
7. Richer, J.K.; Jacobsen, B.M.; Manning, N.G.; Abel, M.G.; Wolf, D.M.; Horwitz, K.B. Differential gene regulation by the two progesterone receptor isoforms in human breast cancer cells. *J. Biol. Chem.* **2002**, *277*, 5209–5218, doi:10.1074/jbc.M110090200.
8. Knutson, T.P.; Daniel, A.R.; Fan, D.; Silverstein, K.A.; Covington, K.R.; Fuqua, S.A.; Lange, C.A. Phosphorylated and sumoylation-deficient progesterone receptors drive proliferative gene signatures during breast cancer progression. *Breast Cancer Res.* **2012**, *14*, 1–23, doi:10.1186/bcr3211.
9. Daniel, A.R.; Knutson, T.P.; Lange, C.A. Signaling inputs to progesterone receptor gene regulation and promoter selectivity. *Mol. Cell Endocrinol.* **2009**, *308*, 47–52, doi:10.1016/j.mce.2009.01.004.
